# Supplementary material
Source: Springer Nature journal article supplement (https://www.springermedizin.de/resource/supplementary/13002_2010_219_MOESM7_ESM.pdf/9627408)

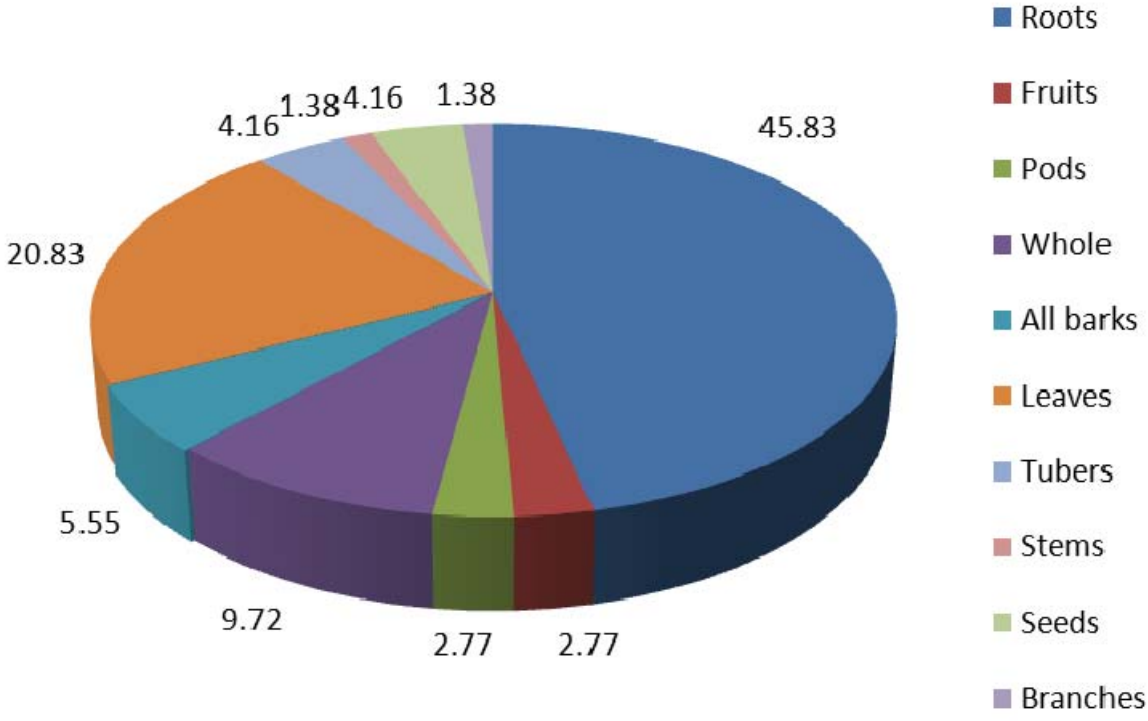

Supplement: MOESM7 [file 9627408]
